# Supplementary material for: Pilot scale removal of per- and polyfluoroalkyl substances and precursors from AFFF-impacted groundwater by granular activated carbon
Source: Royal Society of Chemistry journal article supplement (doi:10.1039/c9ew00936a), 2020-01-01
Supplement: c9ew00936a1.pdf [file c9ew00936a1.pdf]

## **Supporting Information**

### **Pilot Scale Removal of Per- and Polyfluoroalkyl Substances and Precursors from AFFF-Impacted Groundwater by Granular Activated Carbon**

Alix E. Rodowa,<sup>1</sup> Detlef R.U. Knappe,<sup>2</sup> Sheau-Yun Dora Chiang,<sup>3</sup> Dirk Pohlmann,<sup>4</sup> Catharine Varley,<sup>5</sup> Adria Bodour,<sup>5</sup> Jennifer A. Field\*<sup>1</sup>

<sup>1</sup>Department of Environmental and Molecular Toxicology, Oregon State University, Corvallis, OR

<sup>2</sup>Department of Civil, Construction, and Environmental Engineering, North Carolina State University, Raleigh, NC

<sup>3</sup>CDM Smith, Atlanta, GA

<sup>4</sup>Bay West, St. Paul, MN

<sup>5</sup>United States Air Force

\*Corresponding Author

## **Introduction**

The pilot-scale GAC demonstration site is a former fire training area (FTA) where airplane fire event simulations were completed from 1958 through 1991. The volume of AFFF applied by fire fighters is unknown. It is likely that both ECF-based and FT-based AFFF were used at the site over the decades of active fire training. Historically, fire training exercises were performed almost weekly, but during the last few years of operation, the site was used only about once a month. These training activities of fire simulation involved fuels and solvents being discharged to a mock steel airplane where they were ignited. Note that it is possible that more recent (>1990s) formulations of AFFF were also added to PFAS contamination in groundwater due to military activities. The site has an on-going full-scale pump and treat system for removing Volatile Organic Compounds (VOCs) and PFOS and PFOA in groundwater. The changeout frequency for the lead GAC vessel, based on 50% breakthrough (exhaustion), was designed to be approximately 250 days or every 7-8 months. Since operation of the full-scale GAC system, the treated effluent is discharged to a series of six lateral infiltration galleries. The changeout of the carbon has been more frequent than it was designed. The frequent changeout has resulted in higher operation and maintenance costs for this pump and treat system, which shows the need to fully understand the factors that accelerate GAC loading and lead to spent GAC. Due to the mixed uses of ECF and FT AFFF at the site, precursors are abundant, in-situ transformation have also occurred due to implementation of remediation technologies, such as soil vapor extraction, air sparging, and in-situ chemical oxidation, aerobic or anaerobic biodegradation. Currently, groundwater remediation at this site includes air sparging to remediate VOCs and a pump and treat system for VOCs and PFOA and PFOS.

## **Experimental**

**Solvents and Chemicals-** For analysis HPLC grade water (>99%, high purity, Burdick and Jackson brand), hydrochloric acid (BDH Chemicals), and ammonium acetate (reagent grade, Macrom Chemicals) were purchased from VWR (Radnor, PA). Sodium hydroxide (98%, reagent grade), ethyl acetate (99.9%, reagent grade), potassium persulfate (>99%, ACS reagent), and 2,2,2-Trifluoroethanol (99%, Fluka Analytical) were purchased from Sigma Aldrich (St. Louis, MO). Methanol (>99%, LC/MS grade) was purchased from Fisher Scientific (Hampton, NH).

## Individual PFASs by LC-MS/MS

**Table S1. LC-MS/MS target analyte full name, acronym, acquisition masses and parameters, internal standard, calibration reference, and data quality.**

| Analyte                                     | Acronym   | PI*<br>(m/z ) | CV<br>*<br>(V) | FI-<br>1*<br>(m/z ) | CE*<br>(eV ) | FI-<br>2*<br>(m/z ) | CE*<br>(eV ) | Internal<br>Standard                       | Calibration<br>Reference | Data<br>Quality<br>* | LO<br>Q<br>(ng/L) |
|---------------------------------------------|-----------|---------------|----------------|---------------------|--------------|---------------------|--------------|--------------------------------------------|--------------------------|----------------------|-------------------|
| Perfluorobutanoic acid                      | PFBA      | 213           | 20             | 169                 | 8            | n/a                 | n/a          | [ <sup>13</sup> C <sub>4</sub> ]PFBA       | PFBA                     | Qn                   | 10                |
| Perfluoropentanoic acid                     | PFPeA     | 263           | 20             | 219                 | 8            | n/a                 | n/a          | [ <sup>13</sup> C <sub>3</sub> ]PFPeA      | PFPeA                    | Qn                   | 10                |
| Perfluorohexanoic acid                      | PFHxA     | 313           | 20             | 269                 | 8            | 119                 | 22           | [ <sup>13</sup> C <sub>2</sub> ]PFHxA      | PFHxA                    | Qn                   | 10                |
| Perfluoroheptanoic acid                     | PFHpA     | 363           | 20             | 319                 | 8            | 169                 | 14           | [ <sup>13</sup> C <sub>4</sub> ]PFOA       | PFHpA                    | Sq                   | 10                |
| Perfluorooctanoic acid                      | PFOA      | 413           | 20             | 369                 | 8            | 169                 | 18           | [ <sup>13</sup> C <sub>4</sub> ]PFOA       | PFOA                     | Qn                   | 10                |
| Perfluorononaic acid                        | PFNA      | 463           | 22             | 429                 | 8            | 169                 | 18           | [ <sup>13</sup> C <sub>5</sub> ]PFNA       | PFNA                     | Qn                   | 10                |
| Perfluorodecanoic acid                      | PFDA      | 513           | 22             | 469                 | 10           | 269                 | 18           | [ <sup>13</sup> C <sub>2</sub> ]PFDA       | PFDA                     | Qn                   | 10                |
| Perfluoroundecanoic acid                    | PFUnDA    | 563           | 22             | 519                 | 10           | 169                 | 22           | [ <sup>13</sup> C <sub>2</sub> ]PFUnD<br>A | PFUnDA                   | Qn                   | 10                |
| Perfluorododecanoic acid                    | PFDoDA    | 613           | 22             | 569                 | 10           | 169                 | 24           | [ <sup>13</sup> C <sub>2</sub> ]PFDoD<br>A | PFDoDA                   | Qn                   | 10                |
| Perfluorotridecanoic acid                   | PFTriDA   | 663           | 24             | 619                 | 12           | 169                 | 26           | [ <sup>13</sup> C <sub>2</sub> ]PFDoD<br>A | PFTriDA                  | Sq                   | 10                |
| Perfluorotetradecanoic acid                 | PFTeDA    | 713           | 24             | 669                 | 12           | 169                 | 26           | [ <sup>13</sup> C <sub>2</sub> ]PFDoD<br>A | PFTeDA                   | Sq                   | 10                |
| N-sulfo propyl perfluorobutane sulfonamide  | SPr-FBSA  | 420           | 40             | 78                  | 22           | 298                 | 28           | [ <sup>13</sup> C <sub>4</sub> ]PFOA       | PFOA                     | Ql                   | 10                |
| N-sulfo propyl perfluoropentane sulfonamide | SPr-FPeSA | 470           | 40             | 78                  | 22           | 348                 | 28           | [ <sup>13</sup> C <sub>4</sub> ]PFOA       | PFOA                     | Ql                   | 10                |
| N-sulfo propyl perfluorohexane sulfonamide  | SPr-FHxSA | 520           | 40             | 78                  | 30           | 398                 | 30           | [ <sup>13</sup> C <sub>4</sub> ]PFOA       | PFOA                     | Ql                   | 10                |

|                                                                                              |            |     |    |     |    |     |    |                                          |           |    |    |
|----------------------------------------------------------------------------------------------|------------|-----|----|-----|----|-----|----|------------------------------------------|-----------|----|----|
| Perfluoropropane sulfonate                                                                   | PFPrS      | 249 | 46 | 80  | 32 | 99  | 26 | [ <sup>18</sup> O <sub>2</sub> ]PFBS     | PFPrS     | Ql | 10 |
| Perfluorobutane sulfonate                                                                    | PFBS       | 299 | 50 | 80  | 32 | 99  | 26 | [ <sup>18</sup> O <sub>2</sub> ]PFBS     | PFBS      | Qn | 10 |
| Perfluoropentane sulfonate                                                                   | PFPeS      | 349 | 56 | 80  | 34 | 99  | 28 | [ <sup>18</sup> O <sub>2</sub> ]PFHxS    | PFHxS     | Sq | 10 |
| Branched Perfluorohexane sulfonate                                                           | Br-PFHxS   | 399 | 58 | 80  | 36 | 99  | 28 | [ <sup>18</sup> O <sub>2</sub> ]PFHxS    | PFHxS     | Qn | 10 |
| Perfluorheptane sulfonate                                                                    | PFHpS      | 449 | 64 | 80  | 46 | 99  | 32 | [ <sup>13</sup> C <sub>2</sub> ]PFOS     | PFOS      | Sq | 10 |
| Branched Perfluorooctanesulfonic acid                                                        | Br-PFOS    | 499 | 70 | 80  | 46 | 99  | 34 | [ <sup>13</sup> C <sub>2</sub> ]PFOS     | PFOS      | Qn | 10 |
| Perfluorononane sulfonate                                                                    | PFNS       | 549 | 72 | 80  | 50 | 99  | 36 | [ <sup>13</sup> C <sub>2</sub> ]PFOS     | PFDS      | Sq | 10 |
| Perfluorodecane sulfonate                                                                    | PFDS       | 599 | 76 | 80  | 52 | 99  | 36 | [ <sup>13</sup> C <sub>2</sub> ]PFOS     | PFDS      | Sq | 10 |
| 4:2 fluorotelomer sulfonate                                                                  | 4:2 FTS    | 327 | 42 | 307 | 19 | 81  | 26 | [ <sup>13</sup> C <sub>2</sub> ] 4:2 FtS | 4:2 FTS   | Qn | 10 |
| 6:2 fluorotelomer sulfonate                                                                  | 6:2 FTS    | 427 | 40 | 407 | 22 | 81  | 28 | [ <sup>13</sup> C <sub>2</sub> ] 6:2 FtS | 6:2 FTS   | Qn | 10 |
| 8:2 fluorotelomer sulfonate                                                                  | 8:2 FTS    | 527 | 45 | 507 | 25 | 81  | 32 | [ <sup>13</sup> C <sub>2</sub> ] PFDA    | 8:2 FTS   | Qn | 10 |
| N-(carboxymethyl)-N,N-dimethyl-3-(1H,1H,2H,2H-perfluoro-1-octanesulfonamido)propan-1-aminium | 6:2 FtSaB  | 571 | 78 | 104 | 28 | 58  | 38 | M-PFOS                                   | 6:2 FtSaB | Sq | 10 |
| N-(carboxymethyl)-N,N-dimethyl-3-(1H,1H,2H,2H-perfluoro-1-octanesulfonamido)propan-1-aminium | 6:2 FtSaAm | 513 | 60 | 58  | 44 | 86  | 34 | M-PFOS                                   | PFOS      | Sq | 10 |
| Perfluoropropane sulfonamide                                                                 | FPrSA      | 248 | 40 | 78  | 32 | 119 | 26 | M-PFBS                                   | PFBS      | Ql | 10 |

|                                                                     |                       |     |    |     |    |     |    |         |       |    |    |
|---------------------------------------------------------------------|-----------------------|-----|----|-----|----|-----|----|---------|-------|----|----|
| Perfluorobutane sulfonamide                                         | FBSA                  | 298 | 50 | 119 | 26 | 78  | 32 | M-PFBS  | PFBS  | QI | 10 |
| Perfluoropentane sulfonamide                                        | FPeSA                 | 348 | 40 | 78  | 35 | 119 | 35 | M-FOSA  | FOSA  | QI | 10 |
| Perfluorohexane sulfonamide                                         | FHxSA                 | 398 | 58 | 78  | 36 | 119 | 28 | M-FOSA  | FHxSA | Qn | 50 |
| Perfluorooctane sulfonamide                                         | FOSA                  | 498 | 40 | 78  | 30 | 319 | 30 | M-FOSA  | FOSA  | Qn | 50 |
| Perfluorobutane sulfinate                                           | PFBSi                 | 283 | 50 | 83  | 32 | 119 | 26 | M-PFBS  | PFBS  | QI | 10 |
| Perfluoropentane sulfinate                                          | PFPeSi                | 333 | 40 | 83  | 35 | 119 | 35 | M-PFPeA | PFPeA | QI | 10 |
| Perfluorohexane sulfinate                                           | PFHxSi                | 383 | 20 | 319 | 40 | 83  | 40 | M-PFHxA | PFHxA | QI | 10 |
| Perfluorooctane sulfinate                                           | PFOSi                 | 483 | 40 | 119 | 40 | 419 | 40 | M-PFOA  | PFOA  | QI | 10 |
| 6:2 fluorotelomer sulfonyl propanoamido-dimethylethyl sulfonate     | 6:2 FTSO2PrAd-DiMeEtS | 618 | 40 | 203 | 30 | 152 | 30 | M-PFOA  | PFOA  | QI | 10 |
| 8:2 fluorotelomer sulfonyl propanoamido-dimethylethyl sulfonate     | 8:2 FTSO2PrAd-DiMeEtS | 718 | 40 | 206 | 30 | 152 | 30 | M-PFOA  | PFOA  | QI | 10 |
| N-sulfo propyl dimethyl ammonio propyl perfluorobutane sulfonamide  | SPrAmPr-FBSA          | 507 | 40 | 383 | 40 | 182 | 40 | M-FOSA  | FOSA  | QI | 10 |
| N-sulfo propyl dimethyl ammonio propyl perfluoropentane sulfonamide | SPrAmPr-FPeSA         | 557 | 40 | 433 | 40 | 182 | 40 | M-FOSA  | FOSA  | QI | 10 |
| N-sulfo propyl dimethyl ammonio propyl perfluorohexane sulfonamide  | SPrAmPr-FHxSA         | 607 | 40 | 483 | 40 | 182 | 40 | M-FOSA  | FOSA  | QI | 10 |
| N-Trimethylammoniopropyl perfluorobutane                            | TAmPr-FBSA            | 399 | 40 | 60  | 40 | 116 | 40 | M-FOSA  | FOSA  | QI | 10 |

|                                                                 |                                        |     |    |     |    |     |     |             |               |     |     |  |
|-----------------------------------------------------------------|----------------------------------------|-----|----|-----|----|-----|-----|-------------|---------------|-----|-----|--|
| sulfonamide                                                     |                                        |     |    |     |    |     |     |             |               |     |     |  |
| N-Trimethylammoniopropyl perfluoropentane sulfonamide           | TAmPr-FPeSA                            | 449 | 40 | 60  | 40 | 116 | 40  | M-FOSA      | FOSA          | QI  | 10  |  |
| N-Trimethylammoniopropyl perfluorohexane sulfonamide            | TAmPr-FHxSA                            | 499 | 40 | 60  | 40 | 116 | 40  | M-FOSA      | FOSA          | QI  | 10  |  |
| 6:2 fluorotelomer thia propanoamido dimethyl ethyl sulfonate    | 6:2 FTTh-PrAd-DiMeEtS                  | 586 | 35 | 135 | 20 | 80  | 20  | M-PFOS      | PFOS          | QI  | 10  |  |
| N-methylperfluorooctane sulfonamido acetic acid                 | N-MeFOSAA                              | 570 | 34 | 169 | 20 | 419 | 10  | M-N-MeFOSAA | N-MeFOSA<br>A | Qn  | 10  |  |
| N-ethylperfluorooctane sulfonamido acetic acid                  | N-EtFOSAA                              | 584 | 34 | 419 | 20 | 526 | 20  | M-N-EtFOSAA | N-EtFOSAA     | Qn  | 10  |  |
| 3-Perfluoropentyl propanoic acid (5:3)                          | FPePA                                  | 341 | 19 | 237 | 14 | 217 | 24  | M-PFPeA     | PFPeA         | Sq  | 10  |  |
| 2H-perfluoro-2-octenoic acid                                    | FHUEA                                  | 357 | 18 | 293 | 17 | 243 | 34  | M-PFHxA     | PFHxA         | Sq  | 10  |  |
| 2-perfluorohexylethanoic acid                                   | FHEA                                   | 377 | 20 | 293 | 22 | 63  | 7   | M-PFHxA     | PFHxA         | Sq  | 10  |  |
| Perfluorooctane sulfonamido acetic acid                         | FOSAA                                  | 556 | 45 | 498 | 27 | 78  | 40  | M-PFOA      | PFOA          | Sq  | 10  |  |
| Perfluoro[1,2,3,4- <sup>13</sup> C <sub>4</sub> ]butanoic acid  | [ <sup>13</sup> C <sub>4</sub> ] PFBA  | 217 | 20 | 172 | 8  | n/a | n/a | n/a         | n/a           | n/a | n/a |  |
| Perfluoro[3,4,5- <sup>13</sup> C <sub>3</sub> ]pentanoic acid   | [ <sup>13</sup> C <sub>3</sub> ] PFPeA | 266 | 20 | 222 | 8  | n/a | n/a | n/a         | n/a           | n/a | n/a |  |
| Perfluoro[1,2- <sup>13</sup> C <sub>2</sub> ]hexanoic acid      | [ <sup>13</sup> C <sub>2</sub> ] PFHxA | 315 | 20 | 270 | 8  | n/a | n/a | n/a         | n/a           | n/a | n/a |  |
| Perfluoro[1,2,3,4- <sup>13</sup> C <sub>4</sub> ]heptanoic acid | [ <sup>13</sup> C <sub>4</sub> ] PFHpA | 367 | 15 | 322 | 11 | n/a | n/a | n/a         | n/a           | n/a | n/a |  |

|                                                                    |                                          |     |    |     |    |     |     |     |     |     |     |
|--------------------------------------------------------------------|------------------------------------------|-----|----|-----|----|-----|-----|-----|-----|-----|-----|
| Perfluoro[1,2,3,4- <sup>13</sup> C <sub>4</sub> ]octanoic acid     | [ <sup>13</sup> C <sub>4</sub> ] PFOA    | 417 | 20 | 372 | 8  | n/a | n/a | n/a | n/a | n/a | n/a |
| Perfluoro[1,2- <sup>13</sup> C <sub>2</sub> ]octanoic acid         | [ <sup>13</sup> C <sub>2</sub> ] PFOA    | 415 | 20 | 370 | 9  | n/a | n/a | n/a | n/a | n/a | n/a |
| Perfluoro[1,2,3,4,5- <sup>13</sup> C <sub>5</sub> ]nonanoic acid   | [ <sup>13</sup> C <sub>5</sub> ] PFNA    | 468 | 22 | 423 | 8  | n/a | n/a | n/a | n/a | n/a | n/a |
| Perfluoro[1,2- <sup>13</sup> C <sub>2</sub> ]decanoic acid         | [ <sup>13</sup> C <sub>2</sub> ] PFDA    | 515 | 22 | 470 | 10 | n/a | n/a | n/a | n/a | n/a | n/a |
| Perfluoro[1,2- <sup>13</sup> C <sub>2</sub> ]undecanoic acid       | [ <sup>13</sup> C <sub>2</sub> ] PFUnDA  | 565 | 22 | 519 | 10 | n/a | n/a | n/a | n/a | n/a | n/a |
| Perfluoro[1,2- <sup>13</sup> C <sub>2</sub> ]dodecanoic acid       | [ <sup>13</sup> C <sub>2</sub> ] PFDoDA  | 615 | 22 | 570 | 10 | n/a | n/a | n/a | n/a | n/a | n/a |
| 2H-Perfluoro-[1,2- <sup>13</sup> C <sub>2</sub> ]-2-octenoic acid  | [ <sup>13</sup> C <sub>2</sub> ] FHUEA   | 359 | 18 | 294 | 17 | n/a | n/a | n/a | n/a | n/a | n/a |
| Perfluoro-1-[2,3,4- <sup>13</sup> C <sub>3</sub> ]-butanesulfonate | [ <sup>13</sup> C <sub>2</sub> ] PFBS    | 302 | 31 | 99  | 30 | n/a | n/a | n/a | n/a | n/a | n/a |
| Perfluoro-1-hexane[ <sup>18</sup> O <sub>2</sub> ]sulfonate        | [ <sup>18</sup> O <sub>2</sub> ] PFHxS   | 403 | 58 | 103 | 28 | n/a | n/a | n/a | n/a | n/a | n/a |
| Perfluoro[1,2,3,4- <sup>13</sup> C <sub>4</sub> ]octane sulfonate  | [ <sup>13</sup> C <sub>2</sub> ] PFOS    | 503 | 70 | 99  | 34 | n/a | n/a | n/a | n/a | n/a | n/a |
| 4:2[1,2- <sup>13</sup> C <sub>2</sub> ] fluorotelomer sulfonate    | [ <sup>13</sup> C <sub>2</sub> ] 4:2 FTS | 329 | 30 | 81  | 25 | n/a | n/a | n/a | n/a | n/a | n/a |
| 6:2 [1,2- <sup>13</sup> C <sub>2</sub> ] fluorotelomer sulfonate   | [ <sup>13</sup> C <sub>2</sub> ] 6:2 FTS | 429 | 44 | 409 | 22 | n/a | n/a | n/a | n/a | n/a | n/a |
| 8:2 [1,2- <sup>13</sup> C <sub>2</sub> ] fluorotelomer sulfonate   | [ <sup>13</sup> C <sub>2</sub> ] 8:2 FTS | 529 | 45 | 81  | 35 | n/a | n/a | n/a | n/a | n/a | n/a |
| Perfluoro-1-[ <sup>13</sup> C <sub>8</sub> ]octane sulfonamide     | [ <sup>13</sup> C <sub>8</sub> ] FOSA    | 506 | 40 | 78  | 30 | n/a | n/a | n/a | n/a | n/a | n/a |
| Methyl-d <sub>3</sub> -perfluorooctane sulfonamido acetic acid     | [ <sup>2</sup> H <sub>3</sub> ] MeFOSAA  | 573 | 34 | 419 | 20 | n/a | n/a | n/a | n/a | n/a | n/a |
| Ethyl-d <sub>5</sub> -perfluorooctane sulfonamido acetic acid      | [ <sup>2</sup> H <sub>5</sub> ] EtFOSAA  | 589 | 34 | 419 | 20 | n/a | n/a | n/a | n/a | n/a | n/a |

\*PI (precursor ion), CV (cone voltage), FI (fragmentation ion), CE (collision energy), Qn (quantitative), Sq (semiquantitative), Ql (qualitative), Sc (Screen)[1-3]



**Analysis by LC-QTOF.** Analysis for all individual PFASs were performed on a Shimadzu Exion HPLC (Shimadzu, Kyoto, Japan) attached to a Sciex X500R quadrupole time of flight mass spectrometer (Sciex, Concord, Canada). All instrumental conditions and parameters can be found in Barzen-Hanson et al., 2017.[3] It is important to note that analysis was performed in suspect screening mode for approximately 300 individual PFASs. Non-target analysis for additional unknown PFASs was outside of the scope of this study. In an attempt to identify the PFAS mass in the influent, an upgradient groundwater sample nearer to the source zone than the influent sample in this study was analyzed by LC-QTOF as part of a prior experiment in Barzen-Hanson et al..[3] LC-QTOF analysis identified 52 individual PFASs, and all 52 observed PFASs are included in the LC-MS/MS method created for this study. However, when the positively validated LC-MS/MS method was used to screen the influent, only 16 PFASs were routinely observed.

**TOP Assay-** Equation S2 assumes equal molar conversion of known precursors to PFCAs after oxidation. No attempt was made to account for expected molar concentrations of any individual precursor due to variability of precursor recovery of TOP assay in the authors' previous work and between other laboratories.[4, 5]

TOP assay calculations:

Table S2. Influent analyte concentrations before and after TOP assay (ng/L and nmol)  $\pm$  standard error and summed masses (nmol)  $\pm$  propagated standard error.

|                  | Analyte                          | MW  | Before TOP Assay (ng/L) | After TOP Assay (ng/L) | Before TOP Assay (nmol) | After TOP Assay (nmol) | Net production (nmol) |
|------------------|----------------------------------|-----|-------------------------|------------------------|-------------------------|------------------------|-----------------------|
| Known PFCAs      | PFBA                             | 214 | 78 $\pm$ 14             | 510 $\pm$ 37           | 0.36 $\pm$ 0.18         | 2.4 $\pm$ 0.1          | 2.0 $\pm$ 0.1         |
|                  | PFPeA                            | 264 | 400 $\pm$ 83            | 970 $\pm$ 110          | 1.5 $\pm$ 0.1           | 3.7 $\pm$ 0.2          | 2.2 $\pm$ 0.2         |
|                  | PFHxA                            | 314 | 690 $\pm$ 140           | 5300 $\pm$ 460         | 2.2 $\pm$ 0.2           | 17 $\pm$ 1             | 15 $\pm$ 1            |
|                  | PFHpA                            | 364 | 150 $\pm$ 19            | 230 $\pm$ 16           | 0.41 $\pm$ 0.02         | 0.63 $\pm$ 0.02        | 0.22 $\pm$ 0.03       |
|                  | PFOA                             | 414 | 900 $\pm$ 210           | 1200 $\pm$ 390         | 2.2 $\pm$ 0.2           | 2.9 $\pm$ 0.4          | 0.70 $\pm$ 0.50***    |
|                  | PFNA                             | 464 | 23 $\pm$ 16             | 88 $\pm$ 7             | 0.050 $\pm$ 0.015       | 0.19 $\pm$ 0.05        | 0.14 $\pm$ 0.05***    |
| Known PFSA       | PFBS                             | 300 | 16 $\pm$ 3              | <10                    | 0.053 $\pm$ 0.005       | <0.040                 | ***                   |
|                  | PFPeS                            | 350 | 28 $\pm$ 9              | <10                    | 0.080 $\pm$ 0.011       | <0.033                 | ***                   |
|                  | PFHxS                            | 400 | 1600 $\pm$ 430          | 1400 $\pm$ 190         | 4.0 $\pm$ 0.5           | 3.5 $\pm$ 0.2          | ***                   |
|                  | PFHpS                            | 450 | 87 $\pm$ 34             | 65 $\pm$ 17            | 0.19 $\pm$ 0.03         | 0.14 $\pm$ 0.02        | ***                   |
|                  | PFOS                             | 500 | 3500 $\pm$ 470          | 2900 $\pm$ 220         | 7.0 $\pm$ 0.4           | 5.8 $\pm$ 0.2          | ***                   |
| Known Precursors | 4:2 FtSA                         | 328 | 12 $\pm$ 3              | <3.3                   | 0.037 $\pm$ 0.009       | <0.030                 |                       |
|                  | 6:2 FtSA                         | 428 | 1100 $\pm$ 130          | <3.3                   | 2.6 $\pm$ 0.1           | <0.023                 |                       |
|                  | 8:2 FtSA                         | 528 | 180 $\pm$ 68            | <3.3                   | 0.34 $\pm$ 0.06         | <0.19                  |                       |
|                  | FPeSA                            | 348 | 82 $\pm$ 36             | <3.3                   | 0.24 $\pm$ 0.05         | <0.14                  |                       |
|                  | FHxSA                            | 398 | 2500 $\pm$ 380          | <17                    | 6.3 $\pm$ 0.4           | <0.13                  |                       |
|                  | FOSA                             | 448 | 360 $\pm$ 86            | <17                    | 0.80 $\pm$ 0.09         | <0.11                  |                       |
|                  | N-Tamp-FHxSA                     | 499 | 91 $\pm$ 29             | <3.3                   | 0.18 $\pm$ 0.05         | <0.020                 |                       |
| Summary          | $\Sigma$ PFCAs (nmol)            |     |                         |                        | 6.7 $\pm$ 0.8           | 27 $\pm$ 1             | 20 $\pm$ 2            |
|                  | $\Sigma$ PFSA (nmol)             |     |                         |                        | 11 $\pm$ 1              | 9.4 $\pm$ 0.3          | ***                   |
|                  | $\Sigma$ Known precursors (nmol) |     |                         |                        | 10 $\pm$ 0              | <LOD                   |                       |
|                  | $\Sigma$ Total PFASs (nmol)      |     |                         |                        | 27.7 $\pm$ 1            | 36.4 $\pm$ 1           |                       |

\*\*\*The difference in the mean values of the two groups is not great enough to reject the possibility that the difference is due to random sampling variability. Sampling variability is defined as >30%. There is not a statistically significant difference between the TOP assay before and after oxidation.

a) Calculation for net production of PFCAs:

$$\begin{aligned} \text{Net Production of PFCAs (nmol)} \\ = \Sigma((PFBA_{\text{after oxid}} - PFBA_{\text{before oxid}}) + (PFPeA_{\text{after oxid}} - PFPeA_{\text{before oxid}}) + (PFHxA_{\text{after oxid}} \\ - PFHxA_{\text{before oxid}}) + (PFHpA_{\text{after oxid}} - PFHpA_{\text{before oxid}}) + (PFOA_{\text{after oxid}} - PFOA_{\text{before oxid}}) + (PFNA_{\text{after oxid}} \\ - PFNA_{\text{before oxid}})) \end{aligned}$$

Example:  $\text{Net Production of PFCAs (nmol)} = \Sigma((2.4 - 0.36) + (3.7 - 1.5) + (17 - 2.2) + (0.63 - 0.41) + (2.9 - 2.2) + (0.19 - 0.050)) = 20.10 \text{ nmol}$

b) Calculation for net production of PFCAs (simplified):

$$\text{Net Production of PFCAs (nmol)} = \Sigma PFCAs_{\text{after oxid}} - \Sigma PFCAs_{\text{before oxidation}}$$

Example:  $\text{Net Production of PFCAs (nmol)} = 27 - 6.7 = 20 \text{ nmol}$

c) **Equation S1.** Calculation of unknown precursor mass.

$$\text{Unknown Precursor Mass (nmol)} = \Sigma PFCAs_{\text{after oxid}} - \Sigma PFCAs_{\text{before oxid}} - \Sigma \text{Known Precursors}_{\text{before oxid}}$$

Example:  $\text{Unknown Precursor Mass (nmol)} = 27 - 6.7 - 10 = 9.6 \text{ nmol}$

d) **Equation S2.** Calculation of total mass of PFASs accounted for before the TOP assay (%).<sup>ψ</sup>

Total mass accounted for by known PFAS (%)

$$= \left( \frac{(\Sigma PFCAs_{\text{before oxid}} + \Sigma PFASs_{\text{before oxid}} + \Sigma \text{Known Precursors}_{\text{before oxid}})}{(\Sigma PFCAs_{\text{after oxid}} + \Sigma PFASs_{\text{after oxidation}})} \times 100 \right)$$

Example:  $\text{Total mass accounted for by known PFAS (\%)} = \left( \frac{(6.7 + 11 + 10)}{(27 + 9.4)} \times 100 \right) = \left( \frac{27.7}{36.4} \times 100 \right) = 76\%$

‡As a result of the insignificant, but different, values for  $\Sigma$ PFASs before and after oxidation the authors' have elected to underestimate the total mass accounted for by known PFAS (%) by using  $\Sigma$ PFASs before oxidation.

## Results and Discussion:

### Breakthrough curves

Figure S1. Breakthrough curves for PFCAs, PFSAs, 6:2 FtS, and FHxSA in lead vessel effluent. Red stars denote the  $C/C_0$  for the TOP assay at select bed volumes.

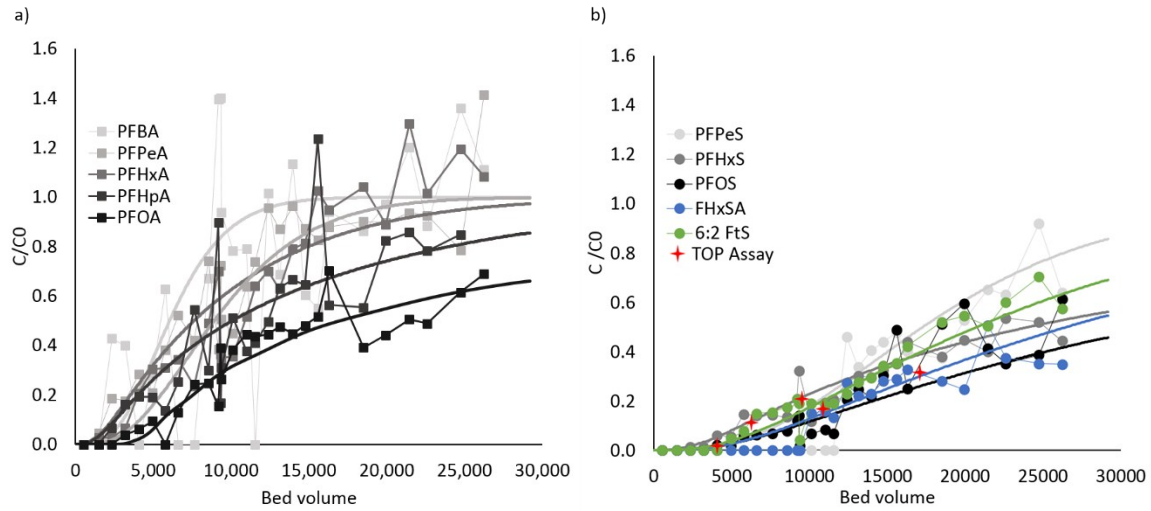

Figure S2. Breakthrough curves for Br- and L-PFOS in lag vessel effluent.

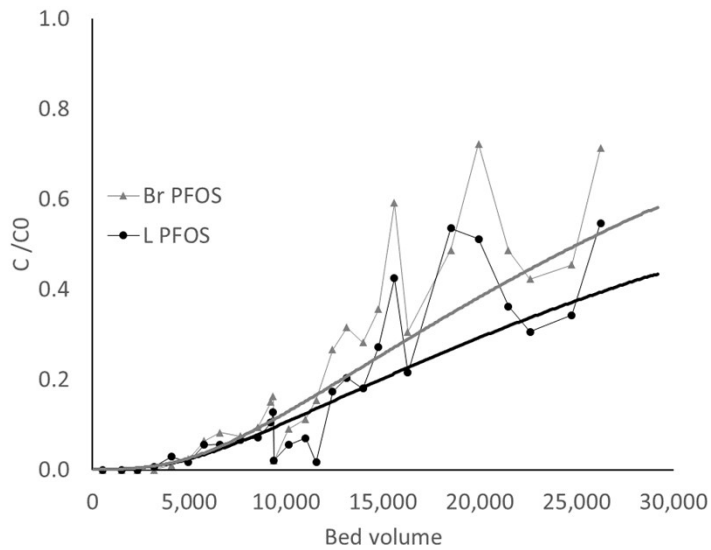

## References

1. Allred, B.; JR, L.; MA, B.; Field, J., Orthogonal zirconium diol/C18 liquid chromatography-tandem mass spectrometry analysis of poly and perfluoroalkyl substances in landfill leachate. *J. Chrom A* **2014**.
2. Backe, W. J.; Day, T. C.; Field, J. A., Zwitterionic, cationic, and anionic fluorinated chemicals in aqueous film forming foam formulations and groundwater from us military bases by nonaqueous large-volume injection HPLC-MS/MS. *Environ. Sci. Technol.* **2013**, *47*, (10), 5226-5234.
3. Barzen-Hanson, K. A.; Roberts, S. C.; Choyke, S.; Oetjen, K.; McAlees, A.; Riddell, N.; McCrindle, R.; Ferguson, P. L.; Higgins, C. P.; Field, J. A., Discovery of 40 Classes of Per- and Polyfluoroalkyl Substances in Historical Aqueous Film-Forming Foams (AFFFs) and AFFF-Impacted Groundwater. *Environ. Sci. Technol.* **2017**, *51*, (4), 2047-2057.
4. Houtz, E. F.; Higgins, C. P.; Field, J. A.; Sedlak, D. L., Persistence of perfluoroalkyl acid precursors in AFFF-impacted groundwater and soil. *Environ. Sci. Technol.* **2013**, *47*, (15), 8187-8195.
5. Munoz, G.; Labadie, P.; Botta, F.; Lestremau, F.; Lopez, B.; Geneste, E.; Pardon, P.; Devier, M. H.; Budzinski, H., Occurrence survey and spatial distribution of perfluoroalkyl and polyfluoroalkyl surfactants in groundwater, surface water, and sediments from tropical environments. *Sci. Total Environ.* **2017**, *607*, 243-252.
